**Running head: High temperatures limit fledging**

1 **Title: Direct and indirect effects of high temperatures on fledging success in a cooperatively**  
2 **breeding bird.**

3 Amanda R. Bourne\*<sup>1</sup>, Amanda R. Ridley<sup>1,2</sup>, Claire N. Spottiswoode<sup>1,3</sup>, Susan J. Cunningham<sup>1</sup>

4 \*Corresponding author: Amanda Bourne [abourne.uct@gmail.com](mailto:abourne.uct@gmail.com)

5 <sup>1</sup> FitzPatrick Institute of African Ornithology, DST-NRF Centre of Excellence, University of Cape Town,  
6 Private Bag X3, Rondebosch 7701, South Africa

7 <sup>2</sup> Centre for Evolutionary Biology, School of Biological Sciences, University of Western Australia,  
8 Crawley 6009, Australia

9 <sup>3</sup> Department of Zoology, University of Cambridge, Downing Street, Cambridge CB2 3EJ, UK

10 **Lay Summary**

11 Hot and dry weather limits breeding success in arid-zone birds. Southern pied babbler nestlings  
12 in the Kalahari are smaller and grow less vigorously during hot and dry weather. Parents adjust  
13 their feeding strategies during hot weather, but this could not compensate for the large, direct  
14 effects of high temperatures on nestling size and daily growth rates. Increasingly hot conditions  
15 due to climate change threaten this and other arid-zone species.

16 **Abstract**

17 High temperatures and low rainfall consistently constrain reproduction in arid-zone bird species.  
18 Understanding the mechanisms underlying this pattern is critical for predicting how climate  
19 change will influence population persistence and to inform conservation and management. In this  
20 study, we analysed Southern Pied Babbler *Turdoides* nestling survival, daily growth rate and adult  
21 investment behaviour during the nestling period over three austral summer breeding seasons. High  
22 temperatures were associated with lower body mass, shorter tarsi, and reduced daily growth rates  
23 of nestlings. Piecewise structural equation modelling suggests that direct impacts of temperature  
24 had the strongest influence, followed by changes in provisioning rates by adults to older nestlings.

**Running head: High temperatures limit fledging**

25 Adjustments to adult provisioning strategies did not compensate for direct negative effects of high  
26 air temperatures on nestling body mass, tarsus and wing length, or daily growth rates. Declining  
27 reproductive success during hot weather poses a potentially serious threat to population  
28 replacement and persistence as climate change progresses, even for currently common and  
29 widespread species. Significantly lower offspring survival as a result of climate warming will  
30 likely contribute to the collapse of animal communities well before temperatures regularly  
31 approach or exceed lethal tolerance limits. Detailed mechanistic data like these allow us to model  
32 the pathways by which high temperature causes nest failure. In turn, this could allow us to design  
33 targeted conservation action to effectively mitigate climate effects.

34 **Keywords**

35 climate change, cooperative breeding, dryland ecology, environmental variability, survival of  
36 young, avian reproduction, reproductive success

37

## Running head: High temperatures limit fledging

### 38 **Introduction**

39 Anthropogenic climate change is affecting wildlife populations around the world (Saino et al.  
40 2011; Iknayan and Beissinger 2018; Ripple et al. 2019; Rosenberg et al. 2019; van de Ven,  
41 McKechnie, et al. 2020), in part via impacts of altered temperature and rainfall patterns on  
42 reproductive success (Stevenson and Bryant 2000; Cahill et al. 2013; Cunningham et al. 2013;  
43 Paniw et al. 2019; van de Ven, Fuller, et al. 2020). Accurately predicting how climate change will  
44 influence reproduction, and hence population persistence, requires an understanding of the  
45 mechanistic links between climate and reproductive outcomes (Conradie et al. 2019; Ratnayake et  
46 al. 2019). Therefore, we need to understand the mechanisms by which temperature and rainfall  
47 affect reproductive outcomes via direct effects on offspring size, daily growth rates, and survival,  
48 as well as indirectly via effects on parental care strategies (Buchholz et al. 2019; van de Ven,  
49 McKechnie, et al. 2020).

50 Adverse weather conditions impair nestling development (Mainwaring et al. 2016; Imlay  
51 et al. 2018) by causing a trade-off between devoting energy to thermoregulation or to growth  
52 (Dawson et al. 2005). High temperatures constrain nestling growth (Cunningham et al. 2013;  
53 Mainwaring and Hartley 2016; Andreasson et al. 2018), result in smaller nestlings overall  
54 (Salaberria et al. 2014; Wada et al. 2015; Rodriguez and Barba 2016), alter corticosterone levels  
55 (Newberry and Swanson 2018; Crino et al. 2020) and reduce survival probabilities (Greño et al.  
56 2008; Zuckerberg et al. 2018; Bourne, Cunningham, et al. 2020a). Higher rainfall often has a  
57 positive effect on nestling development (Wiley and Ridley 2016) and survival (Skagen and Yackel  
58 Adams 2012; Mares et al. 2017), at least in arid and semi-arid ecosystems (Cumming and Bernard  
59 1997; Hidalgo Aranzamendi et al. 2019), although see Morganti et al. (2017) and Cox et al. (2019)  
60 for effects of rainy weather in temperate environments. Nestlings are substantially less likely to

## Running head: High temperatures limit fledging

61 survive during droughts compared to wetter periods (Morrison and Bolger 2002; Conrey et al.  
62 2016; Cruz-McDonnell and Wolf 2016; Bourne, Cunningham, et al. 2020b).

63 Effects of temperature and rainfall on nestlings may be direct, due to impacts on nestling  
64 physiology, or indirect, via for example impacts on parental care behaviours and investment  
65 strategies (Drent and Daan 1980; Salaberria et al. 2014; van de Ven, McKechnie, et al. 2020).  
66 Several recent studies suggest that negative effects of adverse weather can be moderated by  
67 adjustments in parental care strategies including brooding (Oswald et al. 2008; Mainwaring and  
68 Hartley 2016) and provisioning (Auer and Martin 2017; Sofaer et al. 2018). Other studies indicate  
69 that birds trade off foraging behaviour against thermoregulation when provisioning nests, reducing  
70 provisioning rates as temperatures rise (Cunningham et al. 2013; Wiley and Ridley 2016; van de  
71 Ven et al. 2019).

72 The Southern Pied Babbler *Turdoides bicolor* (hereafter pied babbler) is a medium sized  
73 (60-90 g) cooperatively breeding passerine endemic to a semi-arid ecosystem, the Kalahari Desert,  
74 characterised by hot summers and periodic droughts (Hockey et al. 2005; van Wilgen et al. 2016).  
75 Rainfall is extremely variable between years (MacKellar et al. 2014) and, over the last 20 years,  
76 high temperature extremes within the Kalahari have increased in both frequency and severity  
77 (Kruger and Sekele 2013; Bourne, Cunningham, et al. 2020a). Previous research on this species  
78 has shown that high air temperatures during early development are associated with reduced  
79 provisioning rates to nestlings (Wiley and Ridley 2016), smaller nestlings (Wiley and Ridley  
80 2016), reduced likelihood of fledging at least one chick per breeding attempt (Bourne,  
81 Cunningham, et al. 2020a), lower recruitment of young into the adult population (Bourne,  
82 Cunningham, et al. 2020c) and compromised adult foraging efficiency and body mass maintenance  
83 (du Plessis et al. 2012). In short, pied babblers at our study site are likely to reproduce less

## Running head: High temperatures limit fledging

84 successfully during droughts (Bourne, Cunningham, et al. 2020b) and completely fail to fledge  
85 young at mean daily maximum air temperatures of  $> 38^{\circ}\text{C}$  between hatching and fledging (Bourne,  
86 Cunningham, et al. 2020a).

87 Pied babblers are territorial year-round residents and a habituated population at the study  
88 site enables collecting detailed life history and behavioural data from known individuals (Ridley  
89 2016). Here, we use detailed nestling morphometric data and adult behavioural data collected from  
90 marked individuals to explore the mechanisms by which temperature, rainfall and group size  
91 influence the growth and survival of young from hatching to fledging. Specifically, we used  
92 piecewise structural equation modelling [piecewise SEM, (Shipley 2009; Larson et al. 2015; van  
93 de Ven, McKechnie, et al. 2020)] to empirically test whether temperature, rainfall, and group size  
94 influence fledging probabilities via direct effects on nestling mass and structural size (suggesting  
95 a physiological mechanism) or via the indirect effects of adjustments in adult investment behaviour  
96 (suggesting a behavioural mechanism). We further explored temperature, rainfall and group size  
97 effects on nestling daily growth rates and the foraging and provisioning behaviour of adult group  
98 members, both important for interpreting components of the piecewise SEM analyses. Detailed  
99 mechanistic data like these allow us to model the pathways by which high temperatures result in  
100 nest failure. In turn, this could allow us to design targeted conservation action to effectively  
101 mitigate climate effects.

102 Building on previous work demonstrating the impact of temperature on nestling body mass  
103 and adult provisioning rates in pied babblers (Wiley and Ridley 2016), we tested the hypothesis  
104 that high temperatures and low rainfall should reduce nestling size and growth via a combination  
105 of both direct effects on nestlings and indirect effects via reduced provisioning effort. Because  
106 pied babblers are cooperative breeders that engage in load-lightening behaviours (Raihani and

## Running head: High temperatures limit fledging

107 Ridley 2008; Ridley and Raihani 2008; Wiley and Ridley 2016), we further tested the hypothesis  
108 that individuals in larger groups should allocate more time to self-maintenance activities (such as  
109 foraging, resting and preening) during hot weather while maintaining the overall biomass  
110 provisioned to young, sustaining nestling growth rates.

## 111 **Materials and Methods**

### 112 *Study site and system*

113 Data were collected for each austral summer breeding season between September 2016 and  
114 February 2019 (three breeding seasons in total) at the Kuruman River Reserve (33 km<sup>2</sup>, KRR;  
115 26°58'S, 21°49'E) in the southern Kalahari. Mean summer daily maximum temperatures in the  
116 region average  $34.7 \pm 9.7$  °C and mean annual precipitation averages  $186.2 \pm 87.5$  mm (1995–  
117 2015, van de Ven, McKechnie & Cunningham 2019). The Kalahari region is characterised by  
118 hot summers and periodic droughts (van Wilgen et al. 2016), with extremely variable rainfall  
119 between years (MacKellar et al. 2014). Pied babblers live in groups ranging in size from 3–15  
120 adults (Raihani and Ridley 2007a) and breed during the austral summer (September–March),  
121 when it is hottest (Ridley 2016). Pied babbler groups consist of a single breeding pair with  
122 subordinate helpers of both sexes (Nelson-Flower et al. 2011), and all adult group members  
123 (individuals > 1 year old) engage in cooperative behaviours including territory defence and  
124 parental care (Ridley and Raihani 2007; Ridley 2016). Pied babblers lay clutches of ~3 eggs  
125 (Ridley 2016), which hatch after  $14 \pm 1.2$  days (Bourne, Cunningham, et al. 2020a), and  
126 nestlings fledge after  $15.4 \pm 1.7$  days (Bourne, Cunningham, et al. 2020a).

### 127 *Nestling size and daily growth rates (nestling age day 5 and day 11)*

128 Following Ridley and van den Heuvel (2012), we monitored all nests initiated (clutches laid and  
129 incubated) in the study population during each breeding season to determine hatching dates ( $n =$

### Running head: High temperatures limit fledging

130 103 nests in total; 2016/17  $n = 61$ , 2017/18  $n = 22$ , 2018/19  $n = 20$ ). Nestlings were measured  
131 (body mass, tarsus length, and wing length) between 06h00 and 07h00 (morning) and again  
132 between 18h00 and 19h00 (evening) on the 5<sup>th</sup> day after hatching (d5, representing growth during  
133 a fast growth phase;  $n = 93$  nestlings from 37 broods) and the 11<sup>th</sup> day after hatching (d11,  
134 representing growth during an asymptote phase;  $n = 77$  nestlings from 34 broods). Body mass  
135 measurements ( $\pm 0.1$  g) were taken by weighing nestlings on a top-pan scale. Tarsus length was  
136 measured ( $\pm 0.1$  mm) using clock-dial Vernier calipers and wing length ( $\pm 0.1$  mm) using a stopped  
137 rule. All nestling measurements were taken by the same person. Data are presented for right tarsus  
138 and right wing. Natal group size (the number of adults present during the period between hatching  
139 and fledging) and brood size (the number of nestlings in the brood on each measurement day) were  
140 recorded for each brood on each measurement day.

141 Nestling size was recorded as evening body mass, tarsus length and wing length,  
142 representing nestling mass and size at the end of a full day of provisioning by adults. Nestling  
143 daily growth rates were calculated as the percentage change ( $\Delta$ ) in body mass, tarsus length, and  
144 wing length between morning and evening measurements, standardised for differences in the time  
145 between measurements using the equation presented by du Plessis et al (2012):

$$146 \quad \Delta = 100[(x_2 - x_1)/x_2]/[\Delta_t/12]$$

147 where  $\Delta_t$  = number of hours between  $t_1$  (time of morning measurement) and  $t_2$  (time of  
148 evening measurement);  $x_1$  = mass, tarsus, or wing length measurement at  $t_1$  and  $x_2$  = measurement  
149 at  $t_2$ .

## Running head: High temperatures limit fledging

150 *Provisioning rates to nests (nestling age day 5 and day 11)*

151 We recorded the number of provisioning visits to the nest per unit time observed during  
152 the morning (08h00 to 09h30), at midday (12h00 to 13h00), and in the afternoon (15h00 to 16h30)  
153 on d5 ( $n = 26$  broods) and d11 ( $n = 25$  broods), between morning and evening nestling  
154 measurements. Data on provisioning visits were collected using a combination of video cameras  
155 (Sony HDR-XR160E) placed on a tripod 4–6 m from the nest and nest watches undertaken by one  
156 human observer with binoculars, seated 15–20 m from the nest. Provisioning data were captured  
157 using CyberTracker software (v3.448; [www.cybertracker.org](http://www.cybertracker.org)) on an Android smartphone  
158 (Mobicel *TRENDY*).

159 *Adult behaviour data (nestling age day 7-9)*

160 To determine effects of temperature, rainfall and group size on the proportion of time adult birds  
161 allocated to parental care vs. self-maintenance, we conducted 20-minute continuous time-activity  
162 focal behaviour observations (Altmann 1974) on up to four different adult birds per day within  
163 each of 6 focal sessions. We focused on groups with 7- to 9-day-old nestlings, i.e. between the  
164 days on which we had collected nestling morphometric measurements, at 26 different broods.  
165 Focal sessions lasted two hours each, with the first starting at 07h00 and the last starting at 17h00  
166 (i.e. 07h00 to 08h59, 09h00 to 10h59, 11h00 to 12h59, 13h00 to 14h59, 15h00 to 16h59, 17h00 to  
167 19h00). We collected 593 focal behavioural observations (mean focal length =  $19 \pm 1.9$  min) over  
168 108 focal days (mean daily observation length over a focal day =  $108 \pm 17$  min) during three austral  
169 summer breeding seasons (2016/17  $n = 60$  days, 2017/18  $n = 32$  days, 2018/19  $n = 16$  days). We  
170 observed 29 males, 29 females, and 4 individuals of unknown sex. Of these, 27 were dominant  
171 individuals and 35 were subordinates. When group size was = 3 adult individuals, the pair and the  
172 single adult subordinate were studied; when group size was = 4, the pair and both subordinate



## Running head: High temperatures limit fledging

173 adults were studied; when group size was  $> 4$ , the pair and two subordinate adults of opposite sex  
174 (where possible) were studied. We observed each focal individual once within each of the six daily  
175 focal sessions, and randomised the order in which each individual was observed within each focal  
176 session (*sensu* du Plessis et al (2012)). In this way, we collected approximately six focal behaviour  
177 observations per bird per day, spread evenly across the day to minimise time of day effects on  
178 summarised measurements. All birds for which we had fewer than four focal observations per day  
179 were removed from the analyses ( $n = 6$  of 68 individuals). From these data, we could estimate  
180 individual investment in young at the nest (including number of provisioning visits to the nest,  
181 biomass caught vs. provisioned, and time spent attending the nest for each individual), but not the  
182 total number of provisions made to the nest by all group members on that day (because we had to  
183 concentrate on one focal bird at a time). Behaviour data were captured on the Mobicel smartphone  
184 using Prim8 software (McDonald and Johnson 2014), in which the duration of each observed  
185 behaviour can be recorded to the nearest second.

186 For analyses of time budgets, we summed time observed foraging (foraging effort,  
187 including searching for and handling prey), attending the nest (all visits to the nest, including  
188 provisioning, shading and brooding), resting (preening, standing, and perching) and engaging in  
189 other activities (e.g. walking, flying, on sentinel duty, interacting with neighbouring groups) and  
190 calculated the proportion of time allocated to each set of activities across all six focals, at the scale  
191 of a 'focal day'. During each focal behaviour observation, we collected detailed information for  
192 each successful foraging event, including the size class of each item caught and whether or not the  
193 item was provisioned to the nest. We converted prey captures to biomass (wet g) using the  
194 calculations from Raihani & Ridley (2007b). We recorded foraging success as total biomass caught  
195 per bird per focal day, and provisioning rates to the nest as total biomass provisioned per bird per

## Running head: High temperatures limit fledging

196 focal day. Time allocations to different behaviours were averaged over all focals per individual as  
197 focal observations were spread evenly across the day to minimise time-of-day effects on  
198 behavioural investment patterns between individuals ( $F_{5,489} = 1.283$ ,  $P = 0.269$ ; Fig S1) and ensure  
199 that data analysed at the scale of the focal day were comparable between birds and days.

### 200 *Temperature and rainfall*

201 Daily maximum temperature ( $T_{\max}$ , in °C) and rainfall (mm) data were collected from an on-site  
202 weather station at the KRR (Vantage Pro2, Davis Instruments, Hayward, CA, USA). Weather  
203 variables included in statistical models were  $T_{\max}$  on the measurement day and rainfall summed  
204 for the 60 days prior to initiation of the breeding attempt (Rain<sub>60</sub>), to allow for known delays  
205 between rainfall and invertebrate emergence in the Kalahari (Cumming & Bernard, 1997; Ridley  
206 & Child, 2009).

### 207 **Statistical analyses**

208 Statistical analyses were conducted in the R statistical environment, v 3.6.0, using R Studio (R  
209 Core Team 2017).

### 210 *Nestling mass, size and survival (nestling age day 5 and day 11)*

211 In other bird species, larger nestlings with longer tarsi and more developed wings are more likely  
212 to survive to fledging (Kruuk et al. 2015; Mumme et al. 2015; Martin et al. 2018), and prior  
213 research on pied babblers has shown that nestling mass is influenced by environmental factors  
214 such as temperature and rainfall (Wiley and Ridley 2016). We therefore undertook a series of  
215 piecewise SEM analyses (Shipley 2009; Larson et al. 2015; van de Ven, McKechnie, et al. 2020)  
216 to specify and simultaneously quantify all hypothesised relationships regarding whether and to  
217 what extent the impacts of weather conditions on survival to fledging, via d5 and d11 evening

## Running head: High temperatures limit fledging

218 body mass, tarsus length, and wing length, are direct (i.e. could be inferred to result from  
219 physiological limitations of nestlings) or indirect (i.e. mediated via changes in adult behaviour and  
220 therefore provisioning rates to nestlings). We computed piecewise SEMs using the R package  
221 *piecewiseSEM* (Lefcheck 2016), which can accommodate multiple error structures. This capacity  
222 is important because the response terms of our component models have different distributions (see  
223 below). Path coefficients are partial regression coefficients and can be interpreted similarly to  
224 simple and multiple regression outputs. Unstandardised effect sizes are reported and statistical  
225 significance taken as  $P < 0.05$  (Lefcheck 2016).

226 We used piecewise SEM analyses to test the following statistical hypotheses:

227 Survival to fledging is negatively affected by low nestling body mass, short tarsi, and short  
228 wings (logit);

229 Nestling body mass, tarsus length, and wing length are negatively affected by a) high  $T_{\max}$   
230 on the measurement day, b) low  $\text{Rain}_{60}$ , c) smaller group size, d) larger brood size, and e) fewer  
231 provisioning events (Gaussian);

232 Number of provisioning events is negatively affected by a) high  $T_{\max}$ , b) low  $\text{Rain}_{60}$ , c)  
233 smaller group size, and d) smaller brood sizes (Poisson).

234 *Nestling daily growth rates (nestling age day 5 and day 11)*

235 Because daily growth rates influence the body mass, tarsus length, and wing length attained by d5  
236 and d11 nestlings at the time of the evening measurement, we considered the effect of  $\text{Rain}_{60}$ ,  $T_{\max}$ ,  
237 brood size, and natal group size on the percentage change ( $\Delta$ ) in body mass, tarsus length, and  
238 wing length between morning and evening measurements on d5 and d11, including brood identity  
239 as a random term. The inclusion of group identity as a random terms in addition to brood identity

## Running head: High temperatures limit fledging

240 resulted in unstable models and of the two random terms, brood identity explained the greatest  
241 proportion of variation while avoiding destabilising the models (Grueber et al. 2011; Harrison et  
242 al. 2018a). We used maximum likelihood linear mixed-effects models (LMMs) with Gaussian  
243 error structure in the R package *lme4* (Bates et al. 2015).

244 Model selection using the Akaike's information criterion corrected for small sample size  
245 (AICc) was used to determine the model/s that best explained patterns of variation in the data.  
246 Lower AICc values were taken to represent more parsimonious models, following Harrison et al  
247 (2018b). Where there were several models within 2 AICc of the top model, top model sets were  
248 averaged using the package *MuMIn* (Barton 2015). Model estimates with confidence intervals that  
249 did not intersect zero were considered to explain significant patterns in the data (Grueber et al.  
250 2011). Model fits were evaluated using histograms of residuals and Normal Q-Q plots.

### 251 *Adult behaviour (nestling age day 7-9)*

252 To determine which variables best predicted the proportion of time adults spent foraging, resting,  
253 and attending the nest, we fitted binomial GLMMs with Penalised Quasi-Likelihood (glmmPQL)  
254 in the R package *MASS* (Venables and Ripley 2002). The glmmPQL approach, which precludes  
255 model selection (Bolker et al. 2009), was used to address overdispersion in the data not adequately  
256 resolved by the inclusion of an observation level random term while still allowing inclusion of the  
257 random term for brood identity. Proportion of time spent foraging was modelled as a combined  
258 vector of total time spent on the selected activity (seconds) versus total time observed (seconds).  
259 The models included predictor variables  $T_{\max}$ ,  $\text{Rain}_{60}$ , group size, and brood size, as well as sex  
260 and rank of the focal bird. Nestling age was not included in the models because all observations  
261 were collected when nestlings were 7-9 days old.

## Running head: High temperatures limit fledging

262 To determine which variables best predicted biomass caught and biomass provisioned, we  
263 fitted GLMMs with a Poisson error distribution (log link) in the package *lme4* (Bates et al. 2015).  
264 Model selection was undertaken as described for nestling daily growth rates above. Response  
265 variables were rounded to the nearest digit (biomass in g). We considered the influence of  $T_{\max}$ ,  
266  $Rain_{60}$ , group size, brood size, sex, and rank, and included quadratic terms for  $T_{\max}$  and group size  
267 when there was no significant linear effect and visualisation of the data suggested a non-linear  
268 relationship. Model estimates with confidence intervals that did not intersect zero were considered  
269 to explain significant patterns in the data (Grueber et al. 2011). Model fits were evaluated using  
270 the dispersion parameter. Nestling age was not included in the models because all observations  
271 were collected when nestlings were 7-9 days old. Biomass was modelled as the total amount per  
272 observation day because fitting these data resulted in models that were more stable than those  
273 generated by fitting rates (e.g. biomass per hour).

## 274 Results

275 Maximum temperatures on data collection days ranged from 27.2 °C to 41.6 °C (mean = 33.7 ±  
276 3.5 °C), and  $Rain_{60}$  ranged from 0.8 to 174.2 mm (mean = 60.2 ± 55.5 mm). Group sizes averaged  
277 4 ± 1 adults (range: 2 to 6) and brood sizes averaged 3 ± 1 nestlings (range: 1 to 5). Of 99 monitored  
278 nests, 65 clutches hatched, 52 broods survived to 5-days-old (first nestling measurement day), 41  
279 broods survived to 7- to 9-days-old (adult behaviour observation day), and 38 broods survived to  
280 11-days-old (second nestling measurement day). We did not collect all data types at every breeding  
281 attempt and sample sizes achieved are stated for each analysis below.

### 282 *Nestling mass, size, and survival (nestling age d5 and d11)*

283 Piecewise SEM analyses for d5 and d11 nestling mass explained 11% and 22% of the observed  
284 variation in fledging probability respectively (d5: Fisher's *C* for tests of directed separation =

### Running head: High temperatures limit fledging

285 11.95,  $df = 10$ ,  $P = 0.288$ , Fig. 1; d11: Fisher's  $C = 15.78$ ,  $df = 10$ ,  $P = 0.106$ , Fig. 2). Piecewise  
286 SEM analysis showed that, for d5 nestlings, direct effects of temperature on the measurement day  
287 had a significant influence on nestling mass and therefore the probability of surviving until  
288 fledging, whereas indirect effects mediated via provisioning rate did not (Fig 1). In contrast, both  
289 of these pathways were statistically significant for d11 nestlings (Fig 2).

290 Specifically, high temperatures were directly associated with smaller nestling body mass on both  
291 d5 and d11 (d5: Est = -2.775,  $P < 0.001$ ; d11: Est = -0.482,  $P = 0.018$ ), which in turn predicted the  
292 probability of surviving to fledging in both cases (d5: Est = 0.119,  $P = 0.042$ ; d11: Est = 0.478,  $P$   
293 = 0.043). Additionally, for both d5 and d11 nestlings, provisioning efforts by adults were  
294 negatively associated with high temperatures (d5: Est = -0.095,  $P < 0.001$ ; d11: Est = -0.154,  $P =$   
295 0.002). Number of provisioning visits to the nest averaged 31 on cool days ( $T_{\max} < 35.5^{\circ}\text{C}$ ) and 22  
296 on hot days ( $T_{\max} \geq 35.5^{\circ}\text{C}$ ) for d5 nestlings, and 42 and 26 respectively for d11 nestlings. For  
297 both d5 and d11 nestlings, provisioning efforts by adults were positively associated with  $\text{Rain}_{60}$   
298 (d5: Est = 0.123,  $P < 0.001$ ; d11: Est = 0.232,  $P < 0.001$ ), group size (d5: Est = 0.089,  $P = 0.018$ ;  
299 d11: Est = 0.155,  $P < 0.001$ ), and brood size (d5: Est = 0.089,  $P = 0.004$ ; d11: Est = 0.127,  $P =$   
300 0.004). Number of provisioning visits to the nest predicted larger nestling mass (and therefore  
301 higher probability of fledging) on d11 only (d5: Est = -0.017,  $P = 0.726$ , d11: Est = 0.417,  $P =$   
302 0.033).

303

### Running head: High temperatures limit fledging

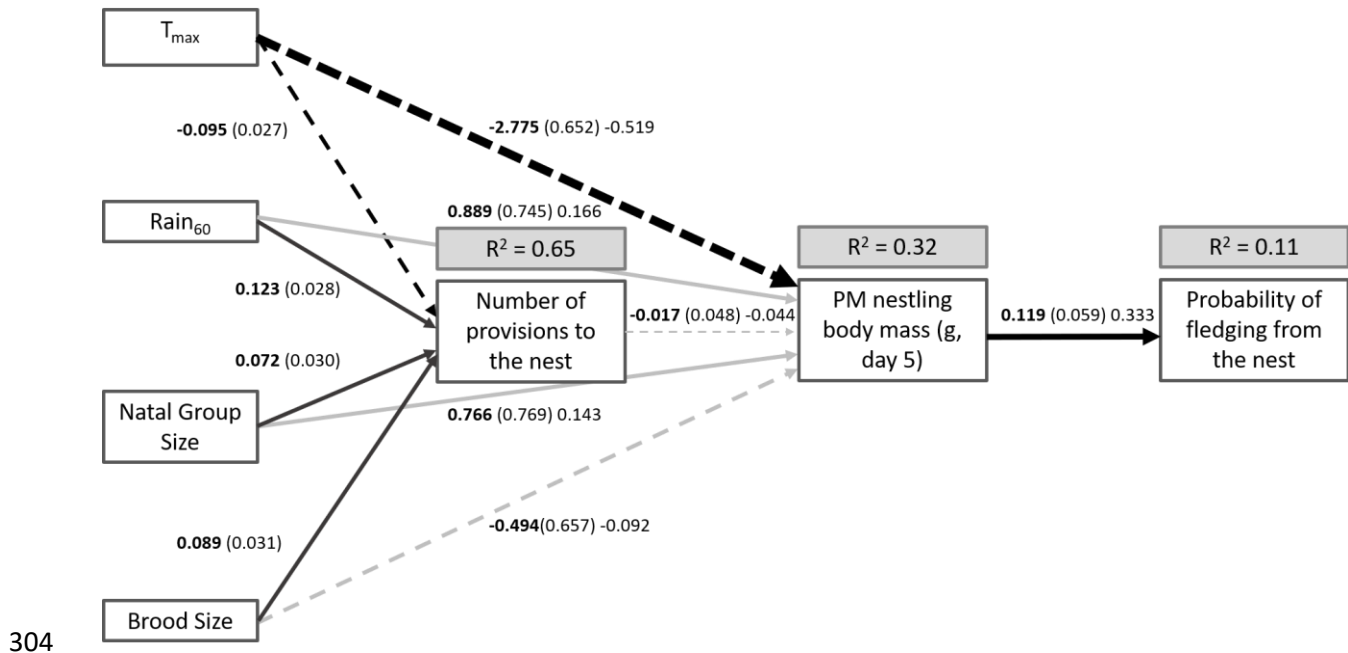

305 *Figure 1: Piecewise SEM exploring the effects of environmental factors (temperature and rainfall), group size, and brood size on*  
 306 *individual probabilities of fledging via number of provisioning visits and nestling mass (evening) 5 days after hatching. Boxes*  
 307 *represent measured variables. Arrows represent unidirectional relationships among variables. Solid arrows denote positive*  
 308 *relationships, dashed arrows negative relationships. Path coefficients are shown in bold, followed by standard errors in*  
 309 *parentheses. Standardised coefficients are shown after standard errors for all pathways except those in the Poisson-distributed*  
 310 *model with number of provisions to the nest as the response variable, for which standardised estimates could not be calculated.*  
 311 *Non-significant paths are grey. Path thickness has been scaled relative to the absolute magnitude of the standardised estimates,*  
 312 *such that stronger effects have thicker arrows. R<sup>2</sup> for component models are given in the grey boxes above response variables.*

313

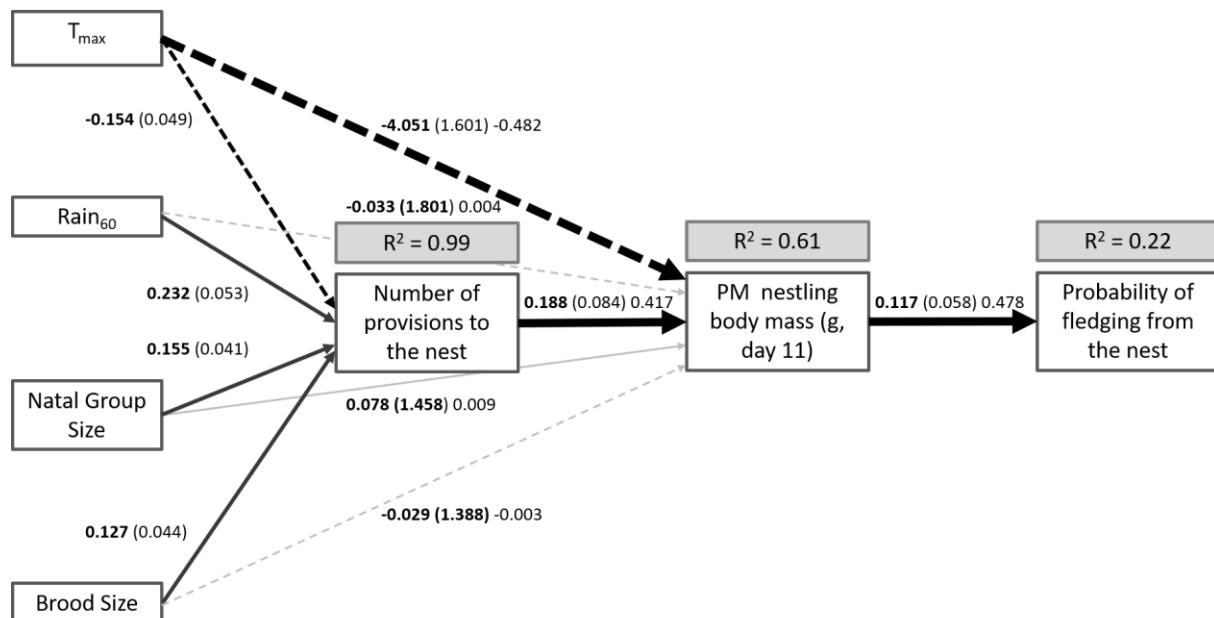

314

315 *Figure 2: Piecewise SEM exploring the effects of environmental factors (temperature and rainfall), group size, and brood size on*  
 316 *individual probabilities of fledging via number of provisioning visits and nestling mass (evening) 11 days after hatching. Boxes*

## Running head: High temperatures limit fledging

317 *represent measured variables. Arrows represent unidirectional relationships among variables. Solid arrows denote positive*  
318 *relationships, dashed arrows negative relationships Path coefficients are shown in bold, followed by standard errors in*  
319 *parentheses. Standardised coefficients are shown after standard errors for all pathways except those in the Poisson-distributed*  
320 *model with number of provisions to the nest as the response variable, for which standardised estimates could not be calculated.*  
321 *Non-significant paths are grey. Path thickness has been scaled relative to the absolute magnitude of the standardised estimates,*  
322 *such that stronger effects have thicker arrows. R<sup>2</sup> for component models are given in the grey boxes above response variables.*

323 Piecewise SEM for tarsus length and wing length explained < 4% of the variation in  
324 fledging probability in d5 nestlings and 33–36% of the variation in fledging probability in d11  
325 nestlings (*Fisher's C* < 15.08, *df* = 10, *P* > 0.129 in all cases, Appendix Fig. S2–S5). Relationships  
326 between  $T_{\max}$ , group size,  $Rain_{60}$ , brood size and provisioning rates were the same as for nestling  
327 mass models above as these used identical datasets. Neither tarsus nor wing length on d5  
328 influenced fledging probabilities, but nestlings with longer tarsi (Est = 0.510, *P* = 0.016) and longer  
329 wings (Est = 0.213, *P* = 0.021) on d11 were more likely to fledge. We found no evidence that  
330 tarsus or wing length were themselves influenced by  $T_{\max}$ ,  $Rain_{60}$ , group size, brood size, or  
331 number of provisioning visits for either nestling age class.

### 332 *Nestling daily growth rates (nestling age d5 and d11)*

333  $T_{\max}$  was the most parsimonious predictor of daily mass gain both in d5 and d11 nestlings,  
334 consistent with the results of the piecewise SEM (i.e. that  $T_{\max}$  was an important predictor of  
335 evening body mass). Nestlings gained less mass, and sometimes even lost mass, between morning  
336 and evening measurements on hotter days. For both d5 and d11 nestlings, we found single best-fit  
337 models for daily mass change containing only  $T_{\max}$  (d5: model weight = 0.645; *n* = 93; Est = -  
338  $4.043 \pm 1.986$ , 95% CI: -7.922, -0.151, *t* = -2.031; Fig. 3A; d11: model weight = 1.00; *n* = 77; Est  
339 =  $-7.028 \pm 1.122$ , 95% CI: -8.393, 4.034, *t* = -6.262, Fig. 3B). Percentage change in tarsus length  
340 and wing length over the same 12 h period was not influenced by any of the included predictor  
341 variables in d5 nestlings, but nestling tarsi grew significantly less between morning and evening  
342 measurements on hotter days in d11 nestlings (top model weight = 0.772; Est =  $-0.804 \pm 0.287$ ,  
343 95% CI: -1.381, -0.285, *t* = -2.797; Fig. 3C). Although the effect was not statistically significant,



## Running head: High temperatures limit fledging

344 d11 nestling wings also tended to grow less on hotter days (Est =  $-0.651 \pm 0.396$ , 95% CI: -1.427,  
345 0.125,  $t = -1.643$ ; Fig. 4D). We found no evidence for effects of Rain<sub>60</sub>, brood size, or natal group  
346 size in any of the nestling daily growth rate analyses (see Table S1–S3 for full model selection  
347 outputs).

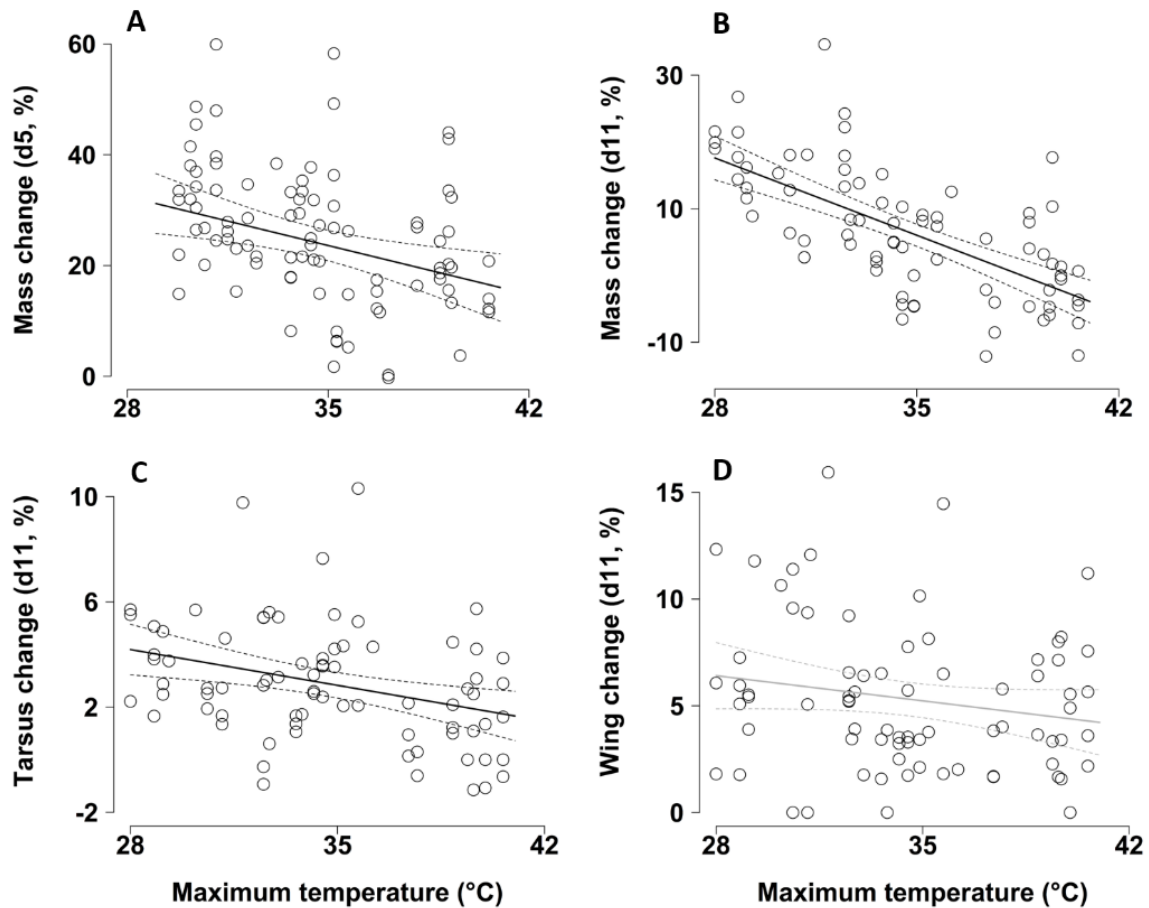

348

349 *Figure 3: The effect of maximum daily temperature ( $T_{max}$ , °C) on nestling daily growth rates (% change over a 12 h period). Data*  
350 *points show the % daily mass change of (A) 5-day-old southern pied babbler *Turdoides bicolor* nestlings and (B) 11-day-old*  
351 *nestlings as well as the (C) % daily tarsus length change and (D) wing length change of 11-day-old nestlings. Solid lines represent*  
352 *predictions from the models and dashed lines the 95% CIs. The regression line in (D) is greyed out as the trend shown was not*  
353 *statistically significant.*

354 *Adult behaviour (nestling age day 7-9)*

355 We observed nest attendance behaviour in 54.3% of focals, and birds spent on average 11  
356  $\pm 23\%$  of their time attending the nest per focal day. However, the total proportion of time

## Running head: High temperatures limit fledging

357 individuals spent attending the nest did not vary significantly with any of the included predictor  
358 variables (Table 1). Adults foraged at least once in 92.6% of focals and overall foraged for  $53 \pm$   
359 29% of the time per focal day. Proportion of time spent foraging tended to be higher for males  
360 than females and was significantly lower in larger groups and after rain. Proportion of time spent  
361 foraging was not influenced by rank, brood size, or  $T_{\max}$  (Table 1). Birds spent on average  $28 \pm$   
362 25% time resting per focal day. The proportion of time spent resting was significantly higher on  
363 hot days, after rain, and in larger groups, but was not influenced by sex, brood size, or rank (Table  
364 1).

365 Total biomass caught per observation day averaged  $7.0 \pm 4.4$  g per bird per focal day ( $n =$   
366 108 focal days, range: 0.0–20.3 g). After averaging the two top models (combined weight = 0.784),  
367 total biomass caught increased with increasing  $T_{\max}$  until  $\sim 32.3^\circ\text{C}$ , after which it declined with  
368 increasing  $T_{\max}$  ( $Z = 3.980$ ,  $P < 0.001$ ; Table 2, Fig. 4A). The effect of group size was also  
369 quadratic: birds in intermediate-sized groups caught less biomass per day than birds in larger and  
370 smaller groups ( $Z = 3.621$ ,  $P < 0.001$ ; Table 2, Fig. 4B). We found no evidence that biomass caught  
371 per day was influenced by sex, rank, brood size, or rainfall (see Table S4 for full model selection  
372 outputs).

## Running head: High temperatures limit fledging

373 *Table 1: GLMM with Penalised Quasi-Likelihood (glmmPQL) model outputs for factors influencing proportion of time spent*  
 374 *foraging, resting, and attending the nest by pied babblers with nestlings aged 7 -9 days after hatching. Models fitted to data from*  
 375 *593 focal observations on 62 different individuals from 13 groups collected over 88 days. Significant terms ( $P < 0.05$ ) are*  
 376 *highlighted in bold. Random term: brood identity*

| Model                                    | Parameters                       | estimate      | SE           | t-value        | P-value      |
|------------------------------------------|----------------------------------|---------------|--------------|----------------|--------------|
| Proportion time spent foraging           | <i>Intercept</i>                 | -0.047        | 0.109        | -0.437         | 0.664        |
|                                          | Brood size                       | 0.157         | 0.092        | 1.701          | 0.105        |
|                                          | <b>Group size</b>                | <b>-0.275</b> | <b>0.090</b> | <b>-3.049</b>  | <b>0.007</b> |
|                                          | Maximum temperature              | -0.114        | 0.094        | -1.221         | 0.227        |
|                                          | <b>Rainfall two months prior</b> | <b>-0.322</b> | <b>0.093</b> | <b>-3.476</b>  | <b>0.003</b> |
|                                          | Rank                             | -0.013        | 0.102        | -0.132         | 0.895        |
|                                          | Sex (Male)                       | 0.208         | 0.105        | 1.986          | 0.051        |
| Proportion time spent resting            | <i>Intercept</i>                 | <b>-0.965</b> | <b>0.134</b> | <b>-7.226</b>  | <b>0.000</b> |
|                                          | Brood size                       | -0.176        | 0.104        | -1.689         | 0.108        |
|                                          | <b>Group size</b>                | <b>0.364</b>  | <b>0.100</b> | <b>3.625</b>   | <b>0.002</b> |
|                                          | <b>Maximum temperature</b>       | <b>0.247</b>  | <b>0.109</b> | <b>2.259</b>   | <b>0.027</b> |
|                                          | <b>Rainfall two months prior</b> | <b>0.437</b>  | <b>0.104</b> | <b>4.222</b>   | <b>0.001</b> |
|                                          | Rank                             | 0.154         | 0.133        | 1.153          | 0.254        |
|                                          | Sex (Male)                       | -0.049        | 0.138        | -0.356         | 0.723        |
| Proportion time spent attending the nest | <i>Intercept</i>                 | <b>-1.768</b> | <b>0.168</b> | <b>-10.507</b> | <b>0.000</b> |
|                                          | Brood size                       | -0.019        | 0.115        | -0.164         | 0.872        |
|                                          | Maximum temperature              | -0.208        | 0.117        | -1.781         | 0.079        |
|                                          | Group size                       | -0.059        | 0.119        | -0.496         | 0.626        |
|                                          | Rainfall two months prior        | -0.219        | 0.127        | -1.722         | 0.101        |
|                                          | Rank                             | -0.284        | 0.223        | -1.275         | 0.207        |
|                                          | Sex (Male)                       | -0.403        | 0.226        | -1.779         | 0.080        |

377

378 Total biomass provisioned to the nest per observation day averaged  $1.2 \pm 1.1$  g per bird per  
 379 focal day ( $n = 108$  focal days, range: 0.0–4.5 g). Rank and group size were the most parsimonious  
 380 predictors of variation in biomass provisioned to the nest (the single best-fit model had a model  
 381 weight of 0.590; Table 2). Subordinate individuals provisioned significantly less ( $1.0 \pm 0.9$  g per  
 382 focal day) than dominant individuals ( $1.4 \pm 1.3$  g;  $Z = -2.228$ ,  $p = 0.026$ ; Fig. 4C). Individuals in  
 383 larger groups provisioned less than those in smaller groups ( $Z = -2.133$ ,  $p = 0.033$ ; Fig. 4D). We

## Running head: High temperatures limit fledging

384 found no evidence that biomass provisioned per day was influenced by temperature, brood size,  
 385 rainfall, or sex (see Table S5 for full model selection outputs).

386 *Table 2: Top model sets for factors influencing total biomass caught per day and total biomass provisioned per day to nestlings 7*  
 387 *to 9 days after hatching. Model averaging was implemented for models with  $\Delta AICc < 2$  of the 'best-fit' model. Significant terms*  
 388 *after model averaging are shown in bold. Data from 56 different individuals from 23 nests by 13 groups over 84 focal days (see*  
 389 *Table S4 and S5 for full model selection outputs).*

|                                                               | <i>AICc</i>     | <i>ΔAICc</i> | <i>ωi</i>            |
|---------------------------------------------------------------|-----------------|--------------|----------------------|
| <b>Response: total biomass caught per day</b>                 |                 |              |                      |
| Null model                                                    | 438.7           | 17.28        | 0.00                 |
| <i>Top model set:</i>                                         |                 |              |                      |
| $T_{max}^2 + \text{Group size}^2$                             | 421.42          | 0.00         | 0.55                 |
| $T_{max}^2 + \text{Group size}^2 + \text{Brood size}$         | 421.81          | 0.39         | 0.45                 |
| <i>Effect size of explanatory terms after model averaging</i> |                 |              |                      |
|                                                               | <i>Estimate</i> | <i>SE</i>    | <i>95% CI</i>        |
| Intercept                                                     | 1.903           | 0.092        | 1.719/2.085          |
| <b><math>T_{max}</math></b>                                   | <b>-0.168</b>   | <b>0.067</b> | <b>-0.301/-0.035</b> |
| <b><math>T_{max}^2</math></b>                                 | <b>-0.228</b>   | <b>0.057</b> | <b>-0.341/-0.116</b> |
| <b>Group size</b>                                             | <b>-0.123</b>   | <b>0.057</b> | <b>-0.236/-0.009</b> |
| <b>Group size<sup>2</sup></b>                                 | <b>0.169</b>    | <b>0.046</b> | <b>0.077/0.259</b>   |
| Brood size                                                    | 0.094           | 0.067        | -0.039/.227          |
| <b>Response: total biomass provisioned per day</b>            |                 |              |                      |
| Null model                                                    | 237.1           | 5.6          | 0                    |
| <i>Top model set:</i>                                         |                 |              |                      |
| Group size + Rank                                             | 231.5           | 0            | 1                    |
| <i>Effect size of explanatory terms after model averaging</i> |                 |              |                      |
|                                                               | <i>Estimate</i> | <i>SE</i>    | <i>95% CI</i>        |
| Intercept                                                     | 0.223           | 0.177        | -0.184/0.539         |
| <b>Rank (subordinate)</b>                                     | <b>-0.468</b>   | <b>0.210</b> | <b>-0.690/-0.029</b> |
| <b>Group size</b>                                             | <b>-0.334</b>   | <b>0.157</b> | <b>-0.890/-0.063</b> |

390

## Running head: High temperatures limit fledging

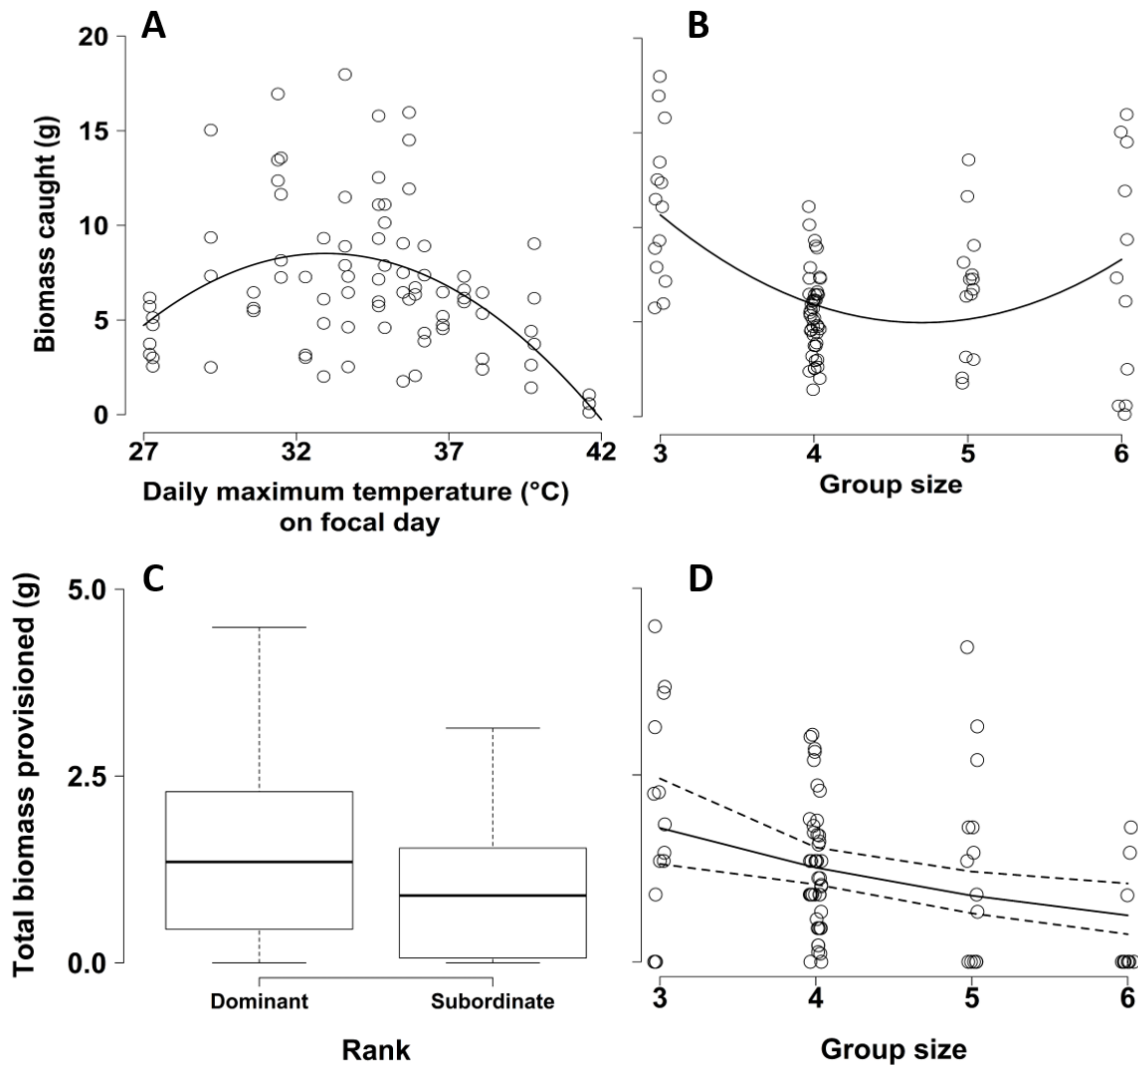

391

392 *Figure 4: Biomass caught per individual per day as a function of daily maximum temperature (A, in °C) and group size (B) on*  
393 *the observation day. Biomass provisioned per individual per day as a function of rank (C) and group size (D) on the observation*  
394 *day.*

## 395 Discussion

396 We investigated the influence of temperature and rainfall on survival of young over the  
397 development period from hatching to fledging, in a cooperatively breeding bird endemic to an arid  
398 environment (the southern Kalahari Desert) heavily affected by climate change (Kruger and Sekele  
399 2013; van Wilgen et al. 2016; Bourne, Cunningham, et al. 2020a; Bourne, Cunningham, et al.

### **Running head: High temperatures limit fledging**

400 2020c). We found that heavier nestlings were significantly more likely to fledge, consistent with  
401 previous studies showing that smaller size in nestlings correlates with reduced survival (Magrath  
402 1991; Schwagmeyer and Mock 2008), and this effect was detectable in nestlings as young as five  
403 days old. Piecewise SEM showed a strong negative influence of high temperatures during the day  
404 on nestling body mass in the evening both directly (in both d5 and d11 nestlings) and indirectly  
405 via impacts on adult provisioning rates (in d11 nestlings only). Multivariate analysis showed that  
406 this result was mirrored by, and potentially explained by, compromised diurnal (12hr) mass gain  
407 in both d5 and d11 nestlings on hotter days. Rainfall and group size positively influenced the  
408 number of provisioning visits by adults to both d5 and d11 nestlings but did not directly influence  
409 nestling structural size in the evening (tarsus and wing length) or daily growth rates. Individual  
410 adult pied babblers maintained the overall proportion of time spent attending the nest as well as  
411 the total biomass provisioned to nestlings at high temperatures, despite reducing the total number  
412 of provisioning visits to the nest overall, and despite declines in the biomass of prey caught per  
413 individual as temperatures increased.

414 That nestling growth was compromised over the course of a single hot day, and that the  
415 impacts of reduced body mass on ultimate fledging probability were evident in nestlings as young  
416 as five days old, suggests that isolated hot days are likely to be detrimental to nestling survival  
417 regardless of whether or not they occur as part of a heat wave. This is consistent with work on  
418 other Kalahari species, suggesting that single hot days, even fairly early in the nestling period, may  
419 continue to affect nestlings up until fledging age (Cunningham et al. 2013). The effect of  
420 temperature on tarsus and wing growth was smaller than for body mass, suggesting that pied  
421 babbler nestlings prioritise limb growth over mass gain under challenging conditions. This is  
422 expected because individual survival in birds depends strongly on physical traits such as wing

**Running head: High temperatures limit fledging**

423 length (Naef-Daenzer and Gruebler 2016; Martin et al. 2018). Longer wings allow for improved  
424 mobility (Jones et al. 2017), better competitive and predator avoidance abilities (Greño et al. 2008),  
425 synchronous fledging (Nilsson and Svensson 1996), and reduced mortality of juveniles (Martin et  
426 al. 2018).

427         Piecewise SEM suggested that direct effects of temperature on evening mass of both d5  
428 and d11 nestlings were more important than indirect effects via adult provisioning rates (also see  
429 van de Ven, McKechnie, et al., 2020), despite the fact that parental care behaviours mediate effects  
430 of weather conditions on nestling growth in other bird species (Weimerskirch et al. 2000; Tremblay  
431 et al. 2005; Cunningham et al. 2013). In this study, the number of provisioning visits was only  
432 important for predicting evening mass, and thus fledging probability, of d11 nestlings. From the  
433 focal behaviour observations of adults in groups with 7- to 9-day-old nestlings, i.e. just before d11  
434 nestling measurements, we learned that adult pied babblers spent a larger proportion of time resting  
435 on hotter than cooler days. However, they did not significantly reduce the proportion of time spent  
436 foraging or attending the nest to achieve this, suggesting that they instead reduced their time spent  
437 on other behaviours (such as vigilance and defending the territory against neighbouring groups).  
438 High temperatures negatively affected total biomass caught and the number of provisioning visits  
439 adults made to the nest (consistent with Wiley & Ridley 2016), but not the total amount  
440 provisioned per bird per day. Thus, birds flew to the nest less frequently but took larger loads each  
441 time. This implies that the only concession provisioning adults make at high temperatures is to  
442 shift from a rate-maximising strategy (frequent visits to the nest) to an efficiency-maximising  
443 strategy (providing a consistent amount of food to nestlings, in terms of total biomass per day,  
444 while limiting the number of provisioning flights by adults as temperatures rise) as temperatures  
445 increase.

### **Running head: High temperatures limit fledging**

446           Less frequent provisioning trips on hotter days are likely to help adult birds avoid raising  
447 body temperature by flying (Engel et al. 2006), as previously suggested by Wiley & Ridley (2016).  
448 However, shifting to an efficiency-maximising strategy appears insufficient to offset the direct  
449 effects of high temperatures on nestling body mass, tarsus and wing length, and daily growth rates.  
450 Wet biomass intake may therefore need to increase at high temperatures to maintain nestling mass  
451 and sustain growth, due to increased nestling demand for water to aid thermoregulation under hot  
452 conditions (Salaberria et al. 2014; van de Ven, McKechnie, et al. 2020; Czenze et al. 2020). If  
453 chicks become dehydrated, growth could be hampered by poor physiological performance due to  
454 costs associated with dehydration and subsequent high body temperatures (Angilletta et al. 2010).  
455 If such elevated water demand does exist when hot, our data suggest that provisioning adults might  
456 be unable to increase biomass provisioned in order meet this demand. This is because biomass  
457 caught declined with increasing temperature above 32.3°C, indicating poorer foraging success (du  
458 Plessis et al. 2012; Cunningham et al. 2015; van de Ven et al. 2019) and suggesting that there was  
459 probably less biomass available at high temperatures with which to provision to nestlings (Conrey  
460 et al. 2016; Dodson et al. 2016; Mella et al. 2018). Adults may also be constrained in their ability  
461 to provision more water-rich food to nestlings at high temperatures due to the increased costs of  
462 flight at high air temperatures (Klaassen 1995; Powers et al. 2017) and the need to attend to their  
463 own water demands (Bourne, Ridley, et al. 2020; Czenze et al. 2020).

464           Nestling body mass, tarsus and wing length, and daily growth rates were not affected by  
465 group size (also see Wiley & Ridley 2016), suggesting that the benefits of cooperation accrue to  
466 adult group members rather than young in this species in terms of nestling growth (Mumme et al.  
467 2015; Savage et al. 2015; Langmore et al. 2016). In keeping with this, adult behaviour was affected  
468 by group size. Nestlings received the same level of care across group sizes, but adults in larger



### **Running head: High temperatures limit fledging**

469 groups invested less per individual in raising young than adults in smaller groups: they spent less  
470 time foraging and more time resting than individuals in smaller groups, and provisioned less  
471 biomass to young per individual on average than those in smaller groups. This adds further support  
472 to previous evidence that ‘load-lightening’ occurs in pied babblers (Raihani and Ridley 2008;  
473 Ridley and Raihani 2008; Wiley and Ridley 2016).

### 474 *Conclusion*

475 High temperatures during the nestling period affected the mass, tarsus length, and survival to  
476 fledging of pied babbler nestlings, consistent with prior research on passerines (Greño et al. 2008;  
477 Salaberria et al. 2014), including this species (Wiley and Ridley 2016; Bourne, Cunningham, et al.  
478 2020a). Piecewise SEM analysis suggests that the majority of this effect is driven by direct effects  
479 of temperature on nestlings, and to a lesser extent by temperature-mediated changes in  
480 provisioning rate to older nestlings. Although parental care strategies are flexible in response to  
481 both climate and social conditions, these strategies have limits (Cunningham et al. 2013; van de  
482 Ven, McKechnie, et al. 2020). Our results suggest that mitigatory actions by provisioning adults  
483 (e.g. the behavioural shifts from rate-maximising to efficiency-maximising provisioning strategies  
484 documented here) failed to compensate fully for direct effects of high temperatures on nestling  
485 growth and development. Repeated exposure to high temperatures during breeding attempts could  
486 therefore undermine population replacement via low recruitment of young into the adult breeding  
487 population, leading to an increasingly detrimental impact of high temperatures on population  
488 persistence over time (Bourne, Cunningham, et al. 2020a; Bourne, Cunningham, et al. 2020b;  
489 Bourne, Cunningham, et al. 2020c). This suggests a mechanism by which predicted temperature

## Running head: High temperatures limit fledging

490 increases in the Kalahari (MacKellar et al. 2014) could negatively affect population growth and  
491 persistence (Cunningham *et al.* 2013, Conradie *et al.* 2019).

492         We highlight the need to quantify multiple simultaneous factors with direct as well as  
493 indirect pathways that influence fledging probabilities, including adult behaviour, investment in  
494 parental care, and offspring growth and development, to identify mechanisms by which birds are  
495 at risk under global change. Sublethal costs of high temperatures such as those documented here  
496 should not be overlooked as they are likely to prove powerful drivers of population decline under  
497 climate change (Conradie et al. 2019; Román-Palacios and Wiens 2020; Trisos et al. 2020).  
498 Impacts on breeding success appear to operate similarly across multiple species (Cunningham et  
499 al. 2013; Salaberria et al. 2014; Cooper et al. 2019; Sharpe et al. 2019; Exposito-Granados et al.  
500 2019 Sep 24; Bourne, Cunningham, et al. 2020a; van de Ven, McKechnie, et al. 2020) and could  
501 cause collapses of animal communities (Iknayan and Beissinger 2018; Riddell et al. 2019; Ripple  
502 et al. 2019; Rosenberg et al. 2019) long before temperatures reach and begin to regularly exceed  
503 lethal limits.

## 504 Literature cited

505 Altmann J. 1974. Observational study of behaviour: sampling methods. *Behaviour*. 49(3):227–  
506 266.

507 Andreasson F, Nord A, Nilsson JÅ. 2018. Experimentally increased nest temperature affects  
508 body temperature, growth and apparent survival in blue tit nestlings. *J Avian Biol.* 49(2):1–14.  
509 doi:10.1111/jav.01620.

510 Angilletta MJ, Cooper BS, Schuler MS, Boyles JG. 2010. The evolution of thermal physiology  
511 in endotherms. *Front Biosci.* E2:861–881.

**Running head: High temperatures limit fledging**

- 512 Auer SK, Martin TE. 2017. Parental care mitigates carry-over effects of poor early conditions on  
513 offspring growth. *Behav Ecol.* 28(4):1176–1182.
- 514 Barton K. 2015. MuMIn: Multi-model inference. [accessed 2020 Jun 1]. [https://cran.r-](https://cran.r-project.org/package=MuMin)  
515 [project.org/package=MuMin](https://cran.r-project.org/package=MuMin).
- 516 Bates D, Maechler M, Bolker B, Walker S. 2015. Fitting linear mixed effects models using lme4.  
517 *J Stat Softw.* 67(1):1–48. <https://cran.r-project.org/web/packages/lme4/index.html>.
- 518 Bolker BM, Brooks ME, Clark CJ, Geange SW, Poulsen JR, Stevens MHH, White J-SS. 2009.  
519 Generalized linear mixed models: a practical guide for ecology and evolution. *Trends Ecol Evol.*  
520 24(3):127–35. doi:10.1016/j.tree.2008.10.008. <http://www.ncbi.nlm.nih.gov/pubmed/19185386>.
- 521 Bourne AR, Cunningham SJ, Spottiswoode CN, Ridley AR. 2020a. High temperatures drive  
522 offspring mortality in a cooperatively breeding bird. *Proc R Soc B.* 287:20201140.  
523 doi:10.1101/2020.05.31.126862.
- 524 Bourne AR, Cunningham SJ, Spottiswoode CN, Ridley AR. 2020b. Compensatory breeding in  
525 years following drought in a desert-dwelling cooperative breeder. *Front Ecol Evol.* 8:190.  
526 doi:10.3389/fevo.2020.00190.
- 527 Bourne AR, Cunningham SJ, Spottiswoode CN, Ridley AR. 2020c. Hot droughts compromise  
528 interannual survival across all group sizes in a cooperatively breeding bird. *Ecol Lett.*  
529 doi:10.1111/ele.13604.
- 530 Bourne AR, Ridley AR, McKechnie AE, Spottiswoode CN, Cunningham SJ. 2020. Dehydration  
531 risk, not ambient incubation, limits nest attendance at high temperatures. *bioRxiv.*  
532 doi:2020.11.18.388025.

**Running head: High temperatures limit fledging**

- 533 Buchholz R, Banusiewicz JD, Burgess S, Crocker-Buta S, Eveland L, Fuller L. 2019.  
534 Behavioural research priorities for the study of animal response to climate change. *Anim Behav.*  
535 150:127–137. doi:10.1016/j.anbehav.2019.02.005.
- 536 Cahill AE, Aiello-Lammens ME, Caitlin Fisher-Reid M, Hua X, Karanewsky CJ, Ryu HY,  
537 Sbeglia GC, Spagnolo F, Waldron JB, Warsi O, et al. 2013. How does climate change cause  
538 extinction? *Proc R Soc B Biol Sci.* 280(1750):20121890.
- 539 Conradie S, Woodborne SM, Cunningham SJ, McKechnie AE. 2019. Chronic, sublethal effects  
540 of high temperatures will cause severe declines in southern African arid-zone birds during the  
541 21st century. *Proc Natl Acad Sci USA.* 116(28):14065–14070.
- 542 Conrey RY, Skagen SK, Yackel Adams AA, Panjabi AO. 2016. Extremes of heat, drought and  
543 precipitation depress reproductive performance in shortgrass prairie passerines. *Ibis (Lond 1859).*  
544 158(3):614–629.
- 545 Cooper CE, Withers PC, Hurley LL, Griffith SC. 2019. The field metabolic rate, water turnover,  
546 and feeding and drinking behavior of a small avian desert granivore during a summer heatwave.  
547 *Front Physiol.* 10:1405.
- 548 Cox AR, Robertson RJ, Lendvai AZ, Everitt K, Bonier F. 2019. Rainy springs linked to poor  
549 nestling growth in a declining avian aerial insectivore (*Tachycineta bicolor*). *Proc R Soc B Biol*  
550 *Sci.* 286(1898):2019.0018.
- 551 Crino OL, Driscoll SC, Brandl HB, Buchanan KL, Griffith SC. 2020. Under the weather:  
552 corticosterone levels in wild nestlings are associated with ambient temperature and wind. *Gen*  
553 *Comp Endocrinol.* 285:113247. doi:10.1016/j.ygcen.2019.113247.  
554 <https://linkinghub.elsevier.com/retrieve/pii/S0016648019302679>.

**Running head: High temperatures limit fledging**

- 555 Cruz-McDonnell KK, Wolf BO. 2016. Rapid warming and drought negatively impact population  
556 size and reproductive dynamics of an avian predator in the arid southwest. *Glob Chang Biol.*  
557 22:237–253.
- 558 Cumming GS, Bernard RTF. 1997. Rainfall, food abundance and timing of parturition in African  
559 bats. *Oecologia.* 111:309–317.
- 560 Cunningham SJ, Martin RO, Hockey PAR. 2015. Can behaviour buffer the impacts of climate  
561 change on an arid-zone bird? *Ostrich.* 86(1–2):119–126.
- 562 Cunningham SJ, Martin RO, Hojem CL, Hockey PAR. 2013. Temperatures in excess of critical  
563 thresholds threaten nestling growth and survival in a rapidly-warming arid savanna: a study of  
564 common fiscals. *PLoS One.* 8(9):e74613.
- 565 Czenze ZJ, Kemp R, van Jaarsveld B, Freeman MT, Smit B, Wolf BO, McKechnie AE. 2020.  
566 Regularly-drinking desert birds have greater evaporative cooling capacity and higher heat  
567 tolerance limits than non-drinking species. *Funct Ecol.* doi:10.1111/1365-2435.13573.
- 568 Dawson RD, Lawrie CC, O’Brien EL. 2005. The importance of microclimate variation in  
569 determining size, growth and survival of avian offspring: Experimental evidence from a cavity  
570 nesting passerine. *Oecologia.* 144(3):499–507. doi:10.1007/s00442-005-0075-7.
- 571 Dodson JC, Moy NJ, Bulluck LP. 2016. Prothonotary warbler nestling diet and growth in  
572 response to variation in aquatic and terrestrial food availability. *Ecol Evol.* 6(20):7462–7474.  
573 doi:10.1002/ece3.2400.
- 574 Drent R, Daan S. 1980. The prudent parent: energetic adjustments in avian breeding. *Ardea.*  
575 68:225–252.

**Running head: High temperatures limit fledging**

- 576 Engel S, Biebach H, Visser GH. 2006. Metabolic costs of avian flight in relation to flight  
577 velocity: A study in Rose- Coloured Starlings (*Sturnus roseus*, Linnaeus). J Comp Physiol B.  
578 176:415–427.
- 579 Exposito-Granados M, Parejo D, Chastel O, Aviles JM. 2019 Sep 24. Physiological stress and  
580 behavioural responses of European Rollers and Eurasian Scops Owls to human disturbance differ  
581 in farming habitats in the south of Spain. Bird Conserv Int.:1–16.  
582 doi:10.1017/S0959270919000388.  
583 [https://www.cambridge.org/core/product/identifier/S0959270919000388/type/journal\\_article](https://www.cambridge.org/core/product/identifier/S0959270919000388/type/journal_article).
- 584 Greño JL, Belda EJ, Barba E. 2008. Influence of temperatures during the nestling period on post-  
585 fledging survival of great tit *Parus major* in a Mediterranean habitat. J Avian Biol. 39:41–49.
- 586 Grueber CE, Nakagawa S, Laws RS, Jamieson IG. 2011. Multimodal inference in ecology and  
587 evolution: challenges and solution. J Evol Biol. 24(4):699–711.
- 588 Harrison XA, Donaldson L, Correa-cano ME, Evans J, Fisher DN, Goodwin CED, Robinson BS,  
589 Hodgson DJ, Inger R. 2018a. A brief introduction to mixed effects modelling and multi-model  
590 inference in ecology. Peer J. 6:1–32.
- 591 Harrison XA, Donaldson L, Correa-cano ME, Evans J, Fisher DN, Goodwin CED, Robinson BS,  
592 Hodgson DJ, Inger R. 2018b. A brief introduction to mixed effects modelling and multi-model  
593 inference in ecology. PeerJ. 6:1–32.
- 594 Hidalgo Aranzamendi N, Hall ML, Kingma SA, van de Pol M, Peters A. 2019. Rapid plastic  
595 breeding response to rain matches peak prey abundance in a tropical savannah bird. J Anim Ecol.  
596 88(11):1799–1811.

**Running head: High temperatures limit fledging**

- 597 Hockey PAR, Dean WRJ, Ryan PG. 2005. Roberts' Birds of Southern Africa, 7th Edition. 7th  
598 ed. Cape Town: John Voleker Bird Book Fund.
- 599 Iknayan KJ, Beissinger SR. 2018. Collapse of a desert bird community over the past century  
600 driven by climate change. *Proc Natl Acad Sci.* 115(34):8597–8602.
- 601 Imlay TL, Mills Flemming J, Saldanha S, Wheelwright NT, Leonard ML. 2018. Breeding  
602 phenology and performance for four swallows over 57 years: relationships with temperature and  
603 precipitation. *Ecosphere.* 9(4):e02166. doi:10.1002/ecs2.2166.
- 604 Jones TM, Ward MP, Benson TJ, Brawn JD. 2017. Variation in nestling body condition and  
605 wing development predict cause-specific mortality in fledgling dickcissels. *J Avian Biol.*  
606 48(3):439–447. doi:10.1111/jav.01143. [accessed 2017 Mar 31].  
607 <http://doi.wiley.com/10.1111/jav.01143>.
- 608 Klaassen M. 1995. Water and energy limitations on flight range. *Auk.* 112(1):260–262.
- 609 Kruger AC, Sekele SS. 2013. Trends in extreme temperature indices in South Africa: 1962–2009.  
610 *Int J Climatol.* 33(3):661–676.
- 611 Kruuk LEB, Osmond HL, Cockburn A. 2015. Contrasting effects of climate on juvenile body  
612 size in a Southern Hemisphere passerine bird. *Glob Chang Biol.* 21(8):2929–2941.  
613 doi:10.1111/gcb.12926.
- 614 Langmore NE, Bailey LD, Heinsohn RG, Russell AF, Kilner RM. 2016. Egg size investment in  
615 superb fairy-wrens: helper effects are modulated by climate. *Proc R Soc B.* 283(1843):10–12.
- 616 Larson JE, Sheley RL, Hardegree SP, Doescher PS, James JJ. 2015. Seed and seedling traits  
617 affecting critical life stage transitions and recruitment outcomes in dryland grasses. *J Appl Ecol.*

**Running head: High temperatures limit fledging**

- 618 52(1):199–209. doi:10.1111/1365-2664.12350.
- 619 Lefcheck JS. 2016. piecewiseSEM: Piecewise structural equation modelling in r for ecology,  
620 evolution, and systematics. *Methods Ecol Evol.* 7(5):573–579. doi:10.1111/2041-210X.12512.
- 621 MacKellar N, New M, Jack C. 2014. Observed and modelled trends in rainfall and temperature  
622 for South Africa: 1960-2010. *S Afr J Sci.* 110(7–8):1–13.
- 623 Magrath RD. 1991. Nestling weight and juvenile survival in the blackbird *Turdus merula*. *J*  
624 *Anim Ecol.* 60(1):335–351.
- 625 Mainwaring MC, Barber I, Deeming DC, Pike DA, Roznik EA, Hartley IR. 2016. Climate  
626 change and nesting behaviour in vertebrates: a review of the ecological threats and potential for  
627 adaptive responses. *Biol Rev.* 92(4). doi:10.1111/brv.12317.
- 628 Mainwaring MC, Hartley IR. 2016. Local weather conditions have complex effects on the  
629 growth of blue tit nestlings. *J Therm Biol.* 60:12–19. doi:10.1016/j.jtherbio.2016.05.005.
- 630 Mares R, Doutrelant C, Paquet M, Spottiswoode CN, Covas R. 2017. Breeding decisions and  
631 output are correlated with both temperature and rainfall in an arid-region passerine, the sociable  
632 weaver. *R Soc Open Sci.* 4(9):170835.  
633 <http://rsos.royalsocietypublishing.org/lookup/doi/10.1098/rsos.170835>.
- 634 Martin TE, Tobalske B, Riordan MM, Case SB, Dial KP. 2018. Age and performance at fledging  
635 are a cause and consequence of juvenile mortality between life stages. *Sci Adv.* 4:1–8.  
636 <http://advances.sciencemag.org/>.
- 637 McDonald M, Johnson S. 2014. “There’s an app for that”: a new program for the collection of  
638 behavioural field data. *Anim Behav.* 95:81–87.



**Running head: High temperatures limit fledging**

- 639 Mella VSA, Possell M, Troxell-Smith SM, McArthur C. 2018. Visit, consume and quit: patch  
640 quality affects the three stages of foraging. Street G, editor. *J Anim Ecol.* 87(6):1615–1626.  
641 doi:10.1111/1365-2656.12882. [accessed 2019 Mar 7]. <http://doi.wiley.com/10.1111/1365->  
642 2656.12882.
- 643 Morganti M, Rubolini D, Caprioli M, Saino N, Ambrosini R. 2017. Rainfall, but not temperature,  
644 negatively affects the growth of Blue Tit *Cyanistes caeruleus* nestlings. *Bird Study.* 64(2):159–  
645 167. doi:10.1080/00063657.2017.1309006. [accessed 2019 Mar 8].  
646 <https://www.tandfonline.com/doi/full/10.1080/00063657.2017.1309006>.
- 647 Morrison SA, Bolger DT. 2002. Variation in a sparrow’s reproductive success with rainfall: food  
648 and predator-mediated processes. *Oecologia.* 133:315–324.
- 649 Mumme RL, Bowman R, Pruett MS, Fitzpatrick JW. 2015. Natal territory size, group size, and  
650 body mass affect lifetime fitness in the cooperatively breeding Florida Scrub-Jay. *Auk.*  
651 132(3):634–646.
- 652 Naef-Daenzer B, Gruebler MU. 2016. Post-fledging survival of altricial birds: ecological  
653 determinants and adaptation. *J F Ornithol.* 87(3):227–250. doi:10.1111/jof.12157. [accessed  
654 2017 Mar 31]. <http://doi.wiley.com/10.1111/jof.12157>.
- 655 Nelson-Flower MJ, Hockey PAR, O’Ryan C, Raihani NJ, Du Plessis MA, Ridley AR. 2011.  
656 Monogamous dominant pairs monopolize reproduction in the cooperatively breeding pied  
657 babbler. *Behav Ecol.* 22(3):559–565.
- 658 Newberry GN, Swanson DL. 2018. Elevated temperatures are associated with stress in rooftop-  
659 nesting common nighthawk (*Chordeiles minor*) chicks. *Conserv Physiol.* 6(1):coy010.  
660 doi:10.1093/conphys/coy010.

**Running head: High temperatures limit fledging**

- 661 Nilsson J, Svensson M. 1996. Sibling competition affects nestling growth strategies in Marsh  
662 Tits. *J Anim Ecol.* 65(6):825–835. doi:10.2307/5680.
- 663 Oswald SA, Bearhop S, Furness RW, Huntley B, Hamer KC. 2008. Heat stress in a high-latitude  
664 seabird: effects of temperature and food supply on bathing and nest attendance of great skuas  
665 *Catharacta skua*. *J Avian Biol.* 39(2):163–169. doi:10.1111/j.2008.0908-8857.04187.x.
- 666 Paniw M, Maag N, Cozzi G, Clutton-Brock T, Ozgul A. 2019. Life history responses of  
667 meerkats to seasonal changes in extreme environments. *Science* (80- ). 363(6427):631–635.
- 668 du Plessis KL, Martin RO, Hockey PAR, Cunningham SJ, Ridley AR. 2012. The costs of  
669 keeping cool in a warming world: Implications of high temperatures for foraging,  
670 thermoregulation and body condition of an arid-zone bird. *Glob Chang Biol.* 18(10):3063–3070.
- 671 Powers DR, Langland KM, Wethington SM, Powers SD, Graham CH, Tobalske BW. 2017.  
672 Hovering in the heat: effects of environmental temperature on heat regulation in foraging  
673 hummingbirds. *R Soc Open Sci.* 4(12). doi:10.1098/rsos.171056.  
674 <http://rsos.royalsocietypublishing.org/lookup/doi/10.1098/rsos.171056>.
- 675 R Core Team. 2017. R: a language and environment for statistical computing. R Core Team,  
676 editor. Vienna, Austria: R Foundation for Statistical Computing. <http://www.r-project.org>.
- 677 Raihani NJ, Ridley AR. 2007a. Variable fledging age according to group size: trade-offs in a  
678 cooperatively breeding bird. *Biol Lett.* 3(6):624–627.
- 679 Raihani NJ, Ridley AR. 2007b. Adult vocalizations during provisioning: offspring response and  
680 postfledging benefits in wild pied babblers. *Anim Behav.* 74(5):1303–1309.  
681 doi:10.1016/j.anbehav.2007.02.025.

**Running head: High temperatures limit fledging**

- 682 Raihani NJ, Ridley AR. 2008. Parental aggression against dependent young results in task  
683 partitioning in a cooperatively breeding bird. *Biol Lett.* 4:23–26.
- 684 Ratnayake HU, Kearney MR, Govekar P, Karoly D, Welbergen JA. 2019. Forecasting wildlife  
685 die-offs from extreme heat events. *Anim Conserv.* 22(4):386–395.
- 686 Riddell EA, Iknayan KJ, Wolf BO, Sinervo B, Beissinger SR. 2019. Cooling requirements fueled  
687 the collapse of a desert bird community from climate change. *Proc Natl Acad Sci.*  
688 116(43):21609–21615. doi:10.1073/pnas.1908791116.  
689 <http://www.ncbi.nlm.nih.gov/pubmed/31570585>.
- 690 Ridley AR. 2016. Southern pied babblers: The dynamics of conflict and cooperation in a group-  
691 living society. In: Dickinson JL, Koenig W, editors. *Cooperative Breeding in Vertebrates:*  
692 *Studies of Ecology, Evolution, and Behavior.* Cambridge, UK: Cambridge University Press. p.  
693 115–132.
- 694 Ridley AR, Child MF. 2009. Specific targeting of host individuals by a kleptoparasitic bird.  
695 *Behav Ecol Sociobiol.* 63:1119–1126.
- 696 Ridley AR, van den Heuvel I. 2012. Is there a difference in reproductive performance between  
697 cooperative and non-cooperative species? A southern African comparison. *Behaviour.* 8:821–  
698 848.
- 699 Ridley AR, Raihani NJ. 2007. Variable postfledging care in a cooperative bird: causes and  
700 consequences. *Behav Ecol.* 18(6):994–1000.
- 701 Ridley AR, Raihani NJ. 2008. Task partitioning increases reproductive output in a cooperative  
702 bird. *Behav Ecol.* 19(6):1136–1142.

**Running head: High temperatures limit fledging**

- 703 Ripple WJ, Wolf C, Newsome TM, Barnard P, Moomaw WR. 2019. World scientists' warning  
704 of a climate emergency: a second notice. *Bioscience*. 67(12):1026–1028.
- 705 Rodriguez S, Barba E. 2016. Nestling growth is impaired by heat stress: an experimental study in  
706 a Mediterranean great tit population. *Zool Stud*. 40(55):2016.55–40. doi:10.6620/ZS.2016.55-40.
- 707 Román-Palacios C, Wiens JJ. 2020. Recent responses to climate change reveal the drivers of  
708 species extinction and survival. *Proc Natl Acad Sci*. 117(8):4211–4217.  
709 doi:10.5061/dryad.4tmpg4f5w. <http://datadryad.org/stash/dataset/doi:10.5061/dryad.4tmpg4f5w>.
- 710 Rosenberg K V., Dokter AM, Blancher PJ, Sauer JR, Smith AC, Smith PA, Stanton JC, Panjabi  
711 A, Helft L, Parr M, et al. 2019. Decline of the North American avifauna. *Science* (80- ).  
712 336(6461):120–124.
- 713 Saino N, Ambrosini R, Rubolini D, Von Hardenberg J, Provenzale A, Hüppop K, Hüppop O,  
714 Lehikoinen A, Lehikoinen E, Rainio K, et al. 2011. Climate warming, ecological mismatch at  
715 arrival and population decline in migratory birds. *Proc R Soc B Biol Sci*. 278(1707):835–842.
- 716 Salaberria C, Celis P, López-Rull I, Gil D. 2014. Effects of temperature and nest heat exposure  
717 on nestling growth, dehydration and survival in a Mediterranean hole-nesting passerine. *Ibis*  
718 (Lond 1859). 156(2):265–275. doi:10.1111/ibi.12121.
- 719 Savage JL, Russell AF, Johnstone RA. 2015. Maternal allocation in cooperative breeders: should  
720 mothers match or compensate for expected helper contributions? *Anim Behav*. 102:189–197.
- 721 Schwagmeyer PL, Mock DW. 2008. Parental provisioning and offspring fitness: size matters.  
722 *Anim Behav*. 75(1):291–298.
- 723 Sharpe L, Cale B, Gardner JL. 2019. Weighing the cost: the impact of serial heatwaves on body

**Running head: High temperatures limit fledging**

- 724 mass in a small Australian passerine. *J Avian Biol.* 50(11):DOI: 10.1111/jav.02355.
- 725 Shipley B. 2009. Confirmatory path analysis in a generalized multilevel context. *Ecology.*  
726 90(2):363–368.
- 727 Skagen SK, Yackel Adams AA. 2012. Weather effects on avian breeding performance and  
728 implications of climate change. *Ecol Appl.* 22(4):1131–45. [accessed 2017 Mar 31].  
729 <http://www.ncbi.nlm.nih.gov/pubmed/22827123>.
- 730 Sofaer HR, Sillett TS, Yoon J, Power ML, Morrison SA, Ghalambor CK. 2018. Offspring  
731 growth and mobility in response to variation in parental care: a comparison between populations.  
732 *J Avian Biol.* 49(5):jav-01646. doi:10.1111/jav.01646.
- 733 Stevenson IR, Bryant DM. 2000. Avian phenology: climate change and constraints on breeding.  
734 *Nature.* 406:366–367.
- 735 Tremblay I, Thomas D, Blondel J, Perret P, Lambrechts MM. 2005. The effect of habitat quality  
736 on foraging patterns, provisioning rate and nestling growth in Corsican blue tits *Parus caeruleus*.  
737 *Ibis (Lond 1859).* 147:17–24.
- 738 Trisos CH, Merow C, Pigot AL. 2020. The projected timing of abrupt ecological disruption from  
739 climate change. *Nature.* 580(January 2019). doi:10.1038/s41586-020-2189-9.  
740 <http://dx.doi.org/10.1038/s41586-020-2189-9>.
- 741 van de Ven TMFN, Fuller A, Clutton-Brock TH. 2020. Effects of climate change on pup growth  
742 and survival in a cooperative mammal, the meerkat. *Funct Ecol.* 34(1):194–202.
- 743 van de Ven TMFN, McKechnie AE, Cunningham SJ. 2019. The costs of keeping cool:  
744 behavioural trade-offs between foraging and thermoregulation are associated with significant

**Running head: High temperatures limit fledging**

745 mass losses in an arid-zone bird. *Oecologia*. 191(1):205–215.

746 van de Ven TMFN, McKechnie AE, Er S, Cunningham SJ. 2020. High temperatures are  
747 associated with substantial reductions in breeding success and offspring quality in an arid-zone  
748 bird. *Oecologia*. 193:225–235.

749 Venables WN, Ripley BD. 2002. *Modern Applied Statistics with S*. Fourth Edi. New York:  
750 Springer.

751 Wada H, Kriengwatana B, Allen N, Schmidt KL, Soma KK, MacDougall-Shackleton SA. 2015.  
752 Transient and permanent effects of suboptimal incubation temperatures on growth, metabolic  
753 rate, immune function and adrenocortical responses in zebra finches. *J Exp Biol*. 218(18):2847–  
754 55. doi:10.1242/jeb.114108. [accessed 2019 Mar 8].  
755 <http://www.ncbi.nlm.nih.gov/pubmed/26206355>.

756 Weimerskirch H, Prince PA, Zimmermann L. 2000. Chick provisioning by the yellow-nosed  
757 albatross *Diomedea chlororhynchos*: response of foraging effort to experimentally increased  
758 costs and demands. *Ibis (Lond 1859)*. 142:103–110.

759 Wiley EM, Ridley AR. 2016. The effects of temperature on offspring provisioning in a  
760 cooperative breeder. *Anim Behav*. 117:187–195.

761 van Wilgen NJ, Goodall V, Holness S, Chown SL, McGeoch MA. 2016. Rising temperatures  
762 and changing rainfall patterns in South Africa’s national parks. *Int J Climatol*. 36(2):706–721.

763 Zuckerberg B, Ribic CA, McCauley LA. 2018. Effects of temperature and precipitation on  
764 grassland bird nesting success as mediated by patch size. *Conserv Biol*. 32(4):872–882.

765
